# Supplementary material
Source: ML conference proceedings conference paper supplement (https://aclanthology.org/D19-1314)
Supplement: Attachment [file D19-1314.Attachment.zip › emnlp2019_cr_30_08_app.pdf]

## A Generated Sentences

Table 9 shows three examples with sentences generated by S2S, Song et al. (2018), G2S-GGNN, and the reference sentence (GOLD).

## B Human Evaluation Setup

- For each quality evaluation task (meaning similarity and readability), we independently sampled 100 generated sentences for each model.
- We created separate HITs for meaning similarity and readability evaluations. Each HIT contains 10 sentences.
- We paid \$0.15 per HIT, employing five workers on each. For qualification, workers were required to have over 1000 approved HITs.
- We applied a quality control step. We removed workers who do not achieve a minimum threshold in sentences with known scores.

|                    |                                                                                                                                                                            |
|--------------------|----------------------------------------------------------------------------------------------------------------------------------------------------------------------------|
| GOLD               | I don't want to be miserable anymore and the longer he is around the more miserable I will be.                                                                             |
| S2S                | If he was in longer longer, I don't want to miserable and more miserable.                                                                                                  |
| Song et. al (2018) | I don't want to be miserable anymore, and when he is around longer, I'm a miserable miserable.                                                                             |
| G2S-GGNN           | I don't want to be miserable anymore, and would be more miserable if he was around longer.                                                                                 |
| GOLD               | Colombia is the source of much of the cocaine and heroin sold in the United States.                                                                                        |
| S2S                | Colombia is a source of cocaine, much of cocaine and heroin sales in the United States.                                                                                    |
| Song et. al (2018) | Colombia is a source of much of much of cocaine and heroin in the United States.                                                                                           |
| G2S-GGNN           | Colombia is a source of much cocaine and heroin and heroin sold in the United States.                                                                                      |
| GOLD               | Discussions between Lula da Silva and Thabo Mbeki would also address new threats to international security such as terrorism, drugs, illegal weapons trafficking and aids. |
| S2S                | Thabo da Silva has also addressed Thabo Mbeki to discuss new threats such as terrorism, drugs, illegal weapons trafficking and aids in international security.             |
| Song et. al (2018) | Lula da Silva's discussion with Thabo also addressed a new threat against Thabo Mbeki and aids, drugs, illegal weapons and illegal weapons of weapon.                      |
| G2S-GGNN           | Lula da Silva's discussion with Thabo da Silva also addressed new threat such as terrorism, drugs, illegal weapons trafficking and aids.                                   |

Table 9: Examples of generated sentences. GOLD refers to the reference sentence.
